# Supplementary figures and images for: Synthesis and photocatalytic performance investigation of an NH4Cl-assisted two-step calcination method for modified g-C3N4
Source: Royal Society of Chemistry journal article supplement (doi:10.1039/d4re00151f), 2024-01-01

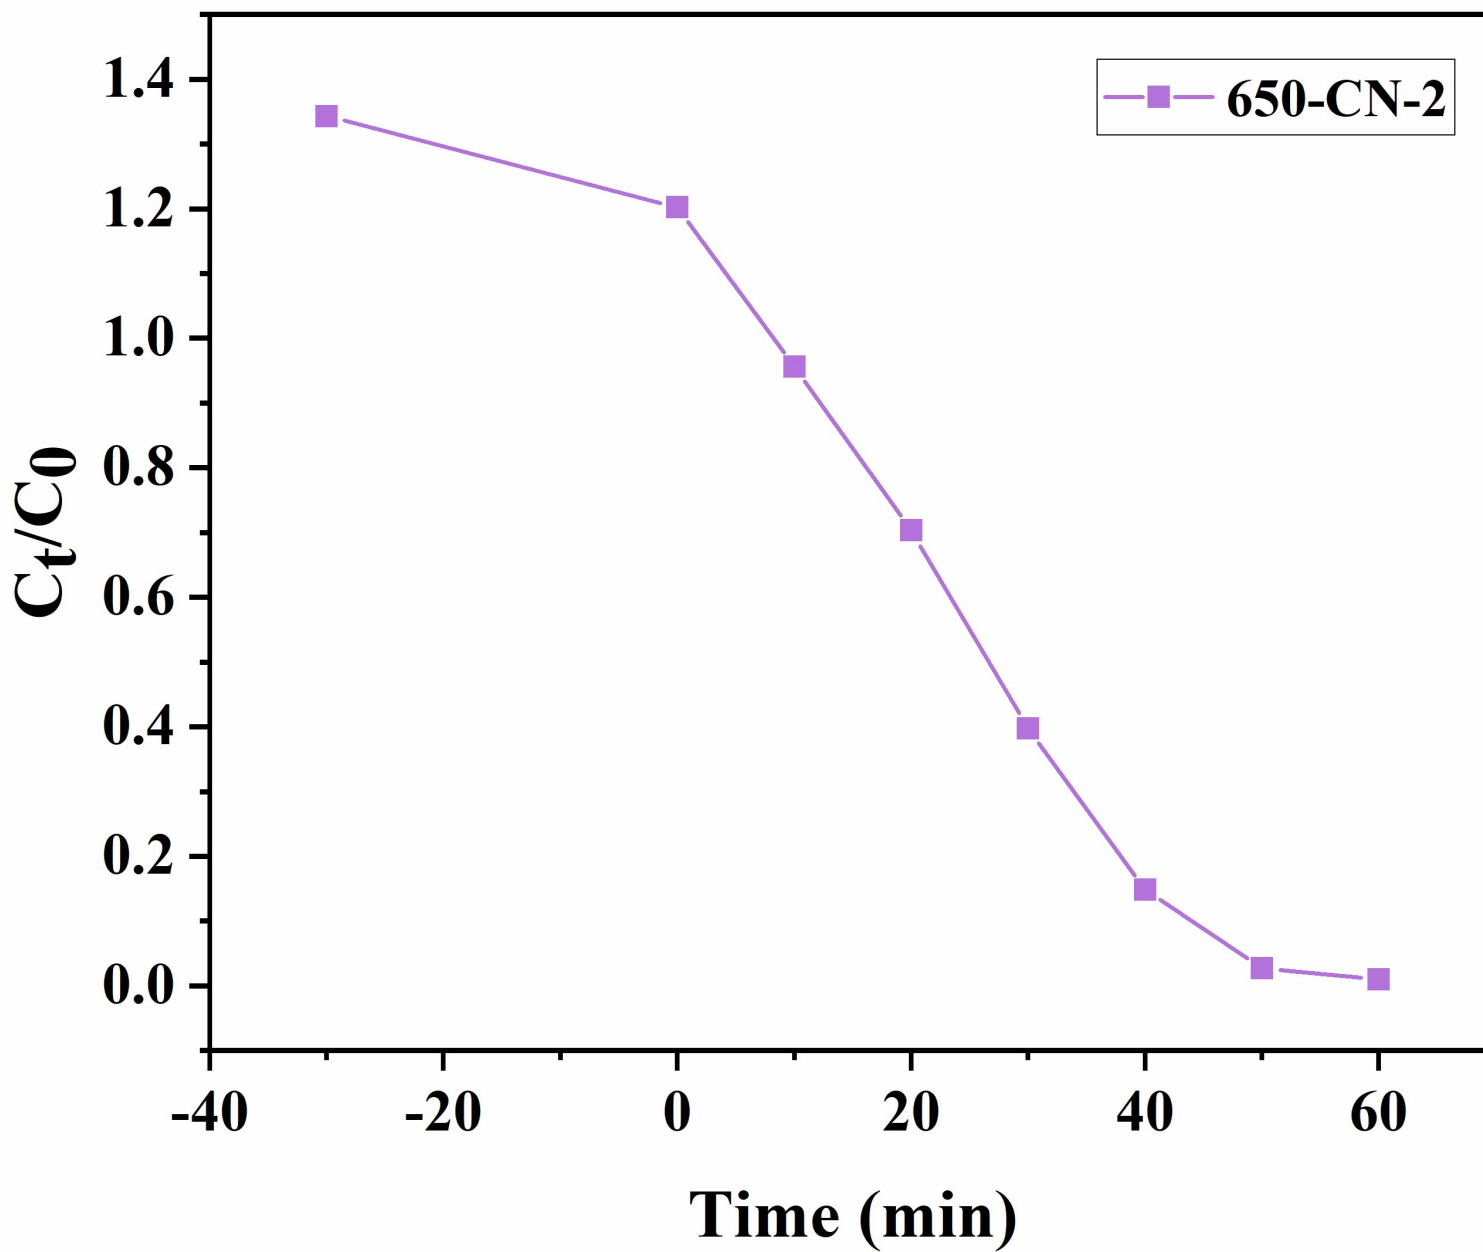

Supplement: d4re00151f2.pdf [file d4re00151f2.pdf]
